# Supplementary material for: Identification and Characterization of UDP-Glycosyltransferase Genes in a Cerambycid Beetle, Pharsalia antennata Gahan, 1894 (Coleoptera: Cerambycidae)
Source: MDPI journal article supplement (doi:10.3390/d14050348), 2022-04-28
Supplement: s1 [file s1]

Table S1

| Gene                   | Primer sequence (5'–3') |                         |
|------------------------|-------------------------|-------------------------|
|                        | Forward primer          | Reverse primer          |
| <b>RT–PCR analysis</b> |                         |                         |
| <i>UGT1</i>            | GATAAGAATCCTCCAAAAGGCG  | GGATGAATTGGTTCTGGTTCG   |
| <i>UGT6</i>            | TGTTTGCTGCTAAGCCTACCG   | GCTTGGCACTATTGGCGTTC    |
| <i>UGT7</i>            | GTGGTGTTCCAAAATGCCATAG  | CTGCATGATGGAGTTGAGCG    |
| <i>UGT9</i>            | CAGCGGATGTAGAAGTAGGCG   | GAACGATGCCACCTCCTACAG   |
| <i>UGT10</i>           | GAATCTTCCGCCACATAAGAGG  | CCATGGGCTTTAACGGTCTG    |
| <i>UGT11</i>           | GCTCGCGTACCATTACAAAGC   | GCAGTTCTTTTTTCGTGCTC    |
| <i>UGT13</i>           | GGAATCCAGTGTTCCATCGTG   | TCGGAATGAGTTGGAAAGCC    |
| <i>UGT14</i>           | CTCTGAACGCCCAATGATC     | CTGGTAATTACGGATCCGAAGC  |
| <i>UGT15</i>           | GTTGCCTCTGAAAGTGTTGTGG  | CTGCTGCAGGATTCCTTAAGTG  |
| <i>UGT20</i>           | TGTAATGAATTGGTCGTACCGG  | TAGAATATCCTGCTGTGGCAGC  |
| <i>UGT21</i>           | CATCACCGCCATCTTACATACC  | TTCGTCCCCTTCCACAAAAC    |
| <i>UGT23</i>           | GGATATTCCCCTTTCGGACAC   | TACAATTCTGCATGGTAACTGCC |
| <i>UGT24</i>           | CTAATGATAACGATGGGAGGCAC | TGTTACAGAATAAGGCGTAGGGC |
| <i>UGT28</i>           | CATCTGAACCATTGCCAACG    | CGCATTCTTCAACTCAACCTTC  |
| <i>UGT30</i>           | TCATGGATTTCAGCGGAGAATG  | TCACTCGTTCTCGATACATCGG  |
| <i>UGT32</i>           | CTCTTGCGAACTTGGTCTTGG   | AGGGCCTGGGTAAGTTCAAAC   |
| <i>UGT33</i>           | GGAAATCTCAAGCGTCTGTCTG  | GATCCGGGATGCTTCTTCAC    |
| <i>UGT34</i>           | CAGCCCTGACCTTCAAAGAGAG  | TTAATGTTGGCTGATCGTCCG   |
| <i>UGT35</i>           | TTGGAAATCCATCGCCTTTG    | CTCCCCTTCCACAAAACCTTC   |
| <i>UGT37</i>           | CAACTCACCCATCCTGGAGTC   | CCAGCAAATGAACACCTCCTC   |
| <i>UGT40</i>           | CCAGTCATAGCCACCAAATCG   | ATTCCCAATGCGTCAACAGC    |
| <i>UGT43</i>           | GAACATTTACCCGGAAAACCTC  | CCTGCAACTTTAAGGTGAGATCC |
| <i>UGT45</i>           | TGGCAGAGGATTAGCAGAAGC   | CGAAAAGTCATGTTGTGCGTG   |
| <i>UGT47</i>           | TGAAGTACCTTACAGGGTCCTGC | TCTAAGGGTGTATTCGATCCACC |
| <i>UGT49</i>           | TCCTGCTCAAAGCGATTTTTTC  | TCCAGGCAAATCTTCATCTTCC  |
| <i>UGT50</i>           | CTGGCAGAAGCAGGACATAATG  | ACATATCCATGTCAGGTGGCG   |
| <i>UGT51</i>           | GGAAGTGTCTTTACGGGGTCAC  | TGGAAGGGTGACACAAATTCC   |
| <i>UGT52</i>           | GTGTCAACATGCTTCTGTGCTG  | TGGATGGTATGGGCTTCCTAC   |
| <i>UGT54</i>           | GCTTATCGCGACTTATGGAAGG  | CCGGATTCAGTGAAGGATGTG   |
| <i>UGT55</i>           | GAGGGAGTTGTCTTTAAGGGGTC | TCGTGGAGAAAGGTAGAAGCAAG |
| <i>UGT56</i>           | CATCACAGAAATCGACGTGAGG  | CGCTGTAAACACCTCCATTCG   |
| <i>UGT59</i>           | TGGAATCCCATATGTCGTAGACC | ATAAGAGGACAGAGGCGACTGC  |
| <i>RPS3</i>            | GTCCGAAGATGGATACTCTGGTG | CAAAGGTTTCTTCGGTCCAGTC  |
| <b>qPCR analysis</b>   |                         |                         |
| <i>UGT1</i>            | TGAGGAGAACTATCAGGAG     | GGCGTATCACATATTCTACC    |

---

|              |                      |                       |
|--------------|----------------------|-----------------------|
| <i>UGT2</i>  | CATCTACATTGCCATCAGAC | CGTTGGGATGTGCTAATATG  |
| <i>UGT3</i>  | CACTTAGAGAGTTGCCATAC | CCACCCTGAGTAACAAATAC  |
| <i>UGT4</i>  | GAGACATAGAGGAGCTAACC | CTCTGTGAATGATGTGCTTG  |
| <i>UGT5</i>  | CTTGATGGAATCCTGAATGC | CGTTCGGATGAGCTAATATG  |
| <i>UGT6</i>  | GAGGGCGTTATCTATTTTAC | GTTTGATGTTAGGTGGTTGG  |
| <i>UGT7</i>  | CTATTTGTAACGCAAGGAGG | CTTCTAGCATGGCATTCTTC  |
| <i>UGT8</i>  | CATAACTCAATGCGGTAGTC | CTTCTTCGTGAGAGTGTTT   |
| <i>UGT9</i>  | CCTAAGGACAACTGAATGC  | CGTGAGATATGAATGCCTTG  |
| <i>UGT10</i> | CCAATCCGCCAGATATTTAC | TAGCATCGTCAAGGTATTCC  |
| <i>UGT11</i> | GCGAATGGATACGGATTTAG | GCTCCCTTATGTCTGATTAC  |
| <i>UGT12</i> | GTGCCTCTGATTGTTATACC | GCTAGTTCCGTTATTGACTC  |
| <i>UGT13</i> | CAGGTATTGGACTTGATCTG | CATACATGAGGTTGGCTAAG  |
| <i>UGT14</i> | GCTACAAGACTATTTGGACG | AGGTAAGTGTGAGAAGGTAC  |
| <i>UGT15</i> | GGTGGACGGAATATGTAATC | GGCTAGAGAAACGAACTTTC  |
| <i>UGT16</i> | GTATCTAATTACGGCGATGC | GTTGTTGAAGACAGTGGTAG  |
| <i>UGT17</i> | GTAACAATCGGTGGTAACAG | CTGAGGTCTTTGCTCTTTAC  |
| <i>UGT18</i> | CATTCTCTACAAGGCAATCC | CCAAAGTGTCTTCTTACGAG  |
| <i>UGT19</i> | CGTCGATATGATGTTCTTGG | AGGCTGAAGTAGATGAATCC  |
| <i>UGT20</i> | GGATGGATATGGAATCACTG | GGTGCCTAATTACAACTCC   |
| <i>UGT21</i> | ATACTAGCCCATCCTAACAC | GACCATAACCATCCATAGTG  |
| <i>UGT22</i> | GGATCAGAGGATGAATGTTG | GGTCTTACAGGTCTATCTCTC |
| <i>UGT23</i> | GTAATTCAGATAGGTGGTGC | GGTAACTGCCTAAATGTCTC  |
| <i>UGT24</i> | CCTACGCCTTATTCTGTAAC | CATCCACTTGACCATTACTG  |
| <i>UGT25</i> | ATTACAATCTACCGAGGAGG | CTCTGCCACTTCAATTATGG  |
| <i>UGT26</i> | CGTAATGGATGTCACCTTAG | GGAGAATGTCATGTCTTGTC  |
| <i>UGT27</i> | GAATGTGGCTAGATCAGTTG | TCTATCCAGAACATGGCTAC  |
| <i>UGT28</i> | GAGGTCTACAGTCTATGGAG | GGTTCGTTTCACTTCCAG    |
| <i>UGT29</i> | GAGGACTCCAATCTACTGAG | CTTCCTTGACAGAATCCTTG  |
| <i>UGT30</i> | GAGTGAAAGAAATCGCTGAG | CCAACAGGAATGCTAATACG  |
| <i>UGT31</i> | CCTTGGTCCTTGTTTCTATC | CTCATGTCTTCTGTGAACTG  |
| <i>UGT32</i> | CGGAAATGCTAGTCTTGATC | ATATTACTCCTTCGGGTGAG  |
| <i>UGT33</i> | GTTCCACAACACTTACTACC | CAACTTCTATAACACCAGGC  |
| <i>UGT34</i> | GTAAACAGATGCCTGATACC | GGACATCTTGTTGAGGAATC  |
| <i>RPL10</i> | GTGCGTCCATTTAGTATCAG | GTGAAGTCTCATTTCGGATG  |
| <i>RPS3</i>  | GGCTTGTTATGGTGTCTTG  | TTCATGGACTTCGCTCTC    |

---
